# Supplementary material for: Greenhouse gas emissions and carbon footprint of collard greens, spinach and chicory production systems in Southeast of Brazil
Source: Front Plant Sci. 2022 Nov 2;13:1015307. doi: 10.3389/fpls.2022.1015307 (PMC9667872; doi:10.3389/fpls.2022.1015307)
Supplement: Supplementary file 2 [file Table_1.xlsx]

## Sheet: Research data
Cenários	N sintético (kg)	N2O emitido (kg) - N aplicado	N2O emitido (kg) - N lixiviado	N2O emitido (kg) - N volatilizado	Total N2O emitido (kg)	Total CO2eq emitido (kg)	Esterco bovino (kg)	Total de N no esterco (kg)	N2O emitido esterco (kg)	Total CO2eq emitido (kg)	Diesel (L)	CO2 emissão direta diesel (kg)	CO2 emissão indireta diesel (kg)	Total CO2eq diesel (kg)	Calagem (kg)	CO2 direto emitido (kg) - calagem	CO2 indireto emitido (kg) - calagem	Total CO2 calagem (kg)	N (NH4NO3) fabricação (kg)	CO2 fabricação de NH4NO3 (kg)	K2O (KCL) fabricação (kg)	CO2 fabricação de K2O (kg)	P2O5 (SS) fabricação (kg)	CO2 fabricação de P2O5 (kg)	Fungicida (kg)	CO2 fabricação de Fungicida (kg)	Inseticida (L)	CO2 fabricação de Inseticida (kg)	Energia elétrica (kwh)	Total CO2 emitido energia (kg)	Bandejas para mudas (kg)	CO2 fabricação do Plástico por ano (kg)	Plástico casa de vegetação (kg/mês)	CO2 fabricação do Plástico por ano (kg)	Ferro casa de vegetação (kg)	Total de ferro por ano (kg)	CO2 fabricação de ferro por ano (kg)	Tubos PVC (kg/ano)	CO2 fabricação de PVC por ano (kg)	Aspersores (kg/ano)	CO2 fabricação de tubos por ano (kg)	Carbono no solo (t/ha/20anos)
Couve+Espinafre	350	3.5	0.35	0.7875	4.6375	1228.94	40000	680	0.68	180.2	213.5	555.74	124.043	679.784	1500	195	150	115	350	1389.5	280	198.8	420	546	0.192	5.43168	1.272	36.888	1093.95	67.4967	135.74	81.444	8.88889	46.0444	3500	14.5833	19.6875	159.2	350.24	4.16667	7.5	-8.9832
Total consórcio	350	3.5	0.35	0.7875	4.6375	1228.94	40000	680	0.68	180.2	213.5	555.74	124.043	679.784	1500	195	150	115	350	1389.5	280	198.8	420	546	0.192	5.43168	1.272	36.888	1093.95	67.4967	135.74	81.444	8.88889	46.0444	3500	14.5833	19.6875	159.2	350.24	4.16667	7.5	C/CO2 (t/ha/20anos)
Couve	230	2.3	0.23	0.5175	3.0475	807.588	40000	680	0.68	180.2	155.5	404.767	90.3455	495.112	1500	195	150	115	230	913.1	220	156.2	240	312	0.096	2.71584	0.636	18.444	1093.95	67.4967	44	26.4	4.44444	23.0222	1750	7.29167	9.84375	159.2	350.24	4.16667	7.5	-32.9683
Espinafre	180	1.8	0.18	0.405	2.385	632.025	40000	680	0.68	180.2	256	666.368	148.736	815.104	1500	195	150	115	180	714.6	180	127.8	360	468	0.192	5.43168	1.272	36.888	1093.95	67.4967	91.74	55.044	4.44444	23.0222	1750	7.29167	9.84375	159.2	350.24	4.16667	7.5	Total por ano (t/ha/ano)
Total monocultivo	410	4.1	0.41	0.9225	5.4325	1439.61	80000	1360	1.36	360.4	411.5	1071.13	239.081	1310.22	3000	390	300	230	410	1627.7	400	284	600	780	0.288	8.14752	1.908	55.332	2187.9	134.993	135.74	81.444	8.88889	46.0444	3500	14.5833	19.6875	318.4	700.48	8.33333	15	-1.64842
	Fatores de emissão - N sintético	Fator (kg N2O / kg de N)							Fator (kg N / kg de N no esterco)			Fator de emissão direta (kg CO2/L de diesel)	Fator de emissão indireta (kg CO2 eq./L diesel)			Fator de emissão direta calagem (kg CO2/ kg de calcario)	Fator de emissão indireta calagem (kg CO2/kg de calcario)			Fator de emissão fabricação de N (kg CO2/kg de N)		Fator de emissão fabricação de K2O (kg CO2/kg de K2O)		Fator de emissão fabricação P2O5 (kg CO2/kg de P2O5)		Fator de emissão fabricação (kg CO2/kg fungicida)		Fator de emissão fabricação (kg CO2/kg de inseticida)		Fator de emissão fabricação (kg CO2/kWh)		Fator de emissão fabricação (kg CO2/kg PLBD)		Fator de emissão fabricação (kg CO2/kg plastico)			Fator de emissão fabricação (kg CO2/kg ferro)		Fator de emissão fabricação (kg CO2/kg PVC)		Fator de emissão fabricação (kg CO2/kg polyetileno)		SOC
	N2O aplicação de N	0.01							0.001			2.603	0.581			0.13	0.1			3.97		0.71		1.3		28.29		29		0.0617		1.8		5.18			1.35		2.2		1.8	Cref	38
	N2O lixiviação	0.001																																								Flu	0.83
	N2O volatilização	0.00225																																								Fi	0.92
																																										Fmg	1
																																										C/CO2	3.67
Cenários	N sintético (kg)	N2O emitido (kg) - N aplicado	N2O emitido (kg) - N lixiviado	N2O emitido (kg) - N volatilizado	Total N2O emitido (kg)	Total CO2eq emitido (kg)	Esterco bovino (kg)	Total de N no esterco (kg)	N2O emitido esterco (kg)	Total CO2eq emitido (kg)	Diesel (L)	CO2 emissão direta diesel (kg)	CO2 emissão indireta diesel (kg)	Total CO2eq diesel (kg)	Calagem (kg)	CO2 direto emitido (kg) - calagem	CO2 indireto emitido (kg) - calagem	Total CO2 calagem (kg)	N (NH4NO3) fabricação (kg)	CO2 fabricação de NH4NO3 (kg)	K2O (KCL) fabricação (kg)	CO2 fabricação de K2O (kg)	P2O5 (SS) fabricação (kg)	CO2 fabricação de P2O5 (kg)	Fungicida (kg)	CO2 fabricação de Fungicida (kg)	Inseticida (L)	CO2 fabricação de Inseticida (kg)	Energia elétrica (kwh)	Total CO2 emitido energia (kg)	Bandejas para mudas (kg)	CO2 fabricação do Plástico por ano (kg)	Plástico casa de vegetação (kg/mês)	CO2 fabricação do Plástico por ano (kg)	Ferro casa de vegetação (kg)	Total de ferro por ano (kg)	CO2 fabricação de ferro por ano (kg)	Tubos PVC (kg/ano)	CO2 fabricação de PVC por ano (kg)	Aspersores (kg/ano)	CO2 fabricação de tubos por ano (kg)	Carbono no solo (t/ha/20anos)
Couve+Almeirão	410	4.1	0.41	0.9225	5.4325	1439.61	40000	680	0.68	180.2	259	674.177	150.479	824.656	1500	195	150	115	410	1627.7	310	220.1	600	780	0.288	8.14752	1.908	55.332	1093.95	67.4967	264	158.4	8.88889	46.0444	3500	14.5833	19.6875	159.2	350.24	4.16667	7.5	-8.9832
Total consórcio	410	4.1	0.41	0.9225	5.4325	1439.61	40000	680	0.68	180.2	259	674.177	150.479	824.656	1500	195	150	115	410	1627.7	310	220.1	600	780	0.288	8.14752	1.908	55.332	1093.95	67.4967	264	158.4	8.88889	46.0444	3500	14.5833	19.6875	159.2	350.24	4.16667	7.5	C/CO2 (t/ha/20anos)
Couve	230	2.3	0.23	0.5175	3.0475	807.588	40000	680	0.68	180.2	155.5	404.767	90.3455	495.112	1500	195	150	115	230	913.1	220	156.2	240	312	0.096	2.71584	0.636	18.444	1093.95	67.4967	44	26.4	4.44444	23.0222	1750	7.29167	9.84375	159.2	350.24	4.16667	7.5	-32.9683
Almeirão	270	2.7	0.27	0.6075	3.5775	948.038	40000	680	0.68	180.2	389.5	1013.87	226.299	1240.17	1500	195	150	115	270	1071.9	270	191.7	540	702	0.288	8.14752	1.908	55.332	1093.95	67.4967	220	132	4.44444	23.0222	1750	7.29167	9.84375	159.2	350.24	4.16667	7.5	Total por ano (t/ha/ano)
Total monocultivo	500	5	0.5	1.125	6.625	1755.62	80000	1360	1.36	360.4	545	1418.64	316.645	1735.28	3000	390	300	230	500	1985	490	347.9	780	1014	0.384	10.8634	2.544	73.776	2187.9	134.993	264	158.4	8.88889	46.0444	3500	14.5833	19.6875	318.4	700.48	8.33333	15	-1.64842
	Fatores de emissão - N sintético	Fator (kg N2O / kg de N)							Fator (kg N / kg de N no esterco)			Fator de emissão direta (kg CO2/L de diesel)	Fator de emissão indireta (kg CO2 eq./L diesel)			Fator de emissão direta calagem (kg CO2/ kg de calcario)	Fator de emissão indireta calagem (kg CO2/kg de calcario)			Fator de emissão fabricação de N (kg CO2/kg de N)		Fator de emissão fabricação de K2O (kg CO2/kg de K2O)		Fator de emissão fabricação P2O5 (kg CO2/kg de P2O5)		Fator de emissão fabricação (kg CO2/kg fungicida)		Fator de emissão fabricação (kg CO2/kg de inseticida)		Fator de emissão fabricação (kg CO2/kWh)		Fator de emissão fabricação (kg CO2/kg PLBD)		Fator de emissão fabricação (kg CO2/kg plastico)			Fator de emissão fabricação (kg CO2/kg ferro)		Fator de emissão fabricação (kg CO2/kg PVC)		Fator de emissão fabricação (kg CO2/kg polyetileno)
	N2O aplicação de N	0.01							0.001			2.603	0.581			0.13	0.1			3.97		0.71		1.3		28.29		29		0.0617		1.8		5.18			1.35		2.2		1.8	Cref	38
	N2O lixiviação	0.001																																								Flu	0.83
	N2O volatilização	0.00225																																								Fi	0.92
																																										Fmg	1
																																										C/CO2	3.67
